# Supplementary material
Source: PubMed Central journal article supplement (PMC3197809)

# Isotope-Coded Dimethyl Tagging for Differential Quantification of Posttranslational Protein Carbonylation by 4-Hydroxy-2-nonenal, an End-Product of Lipid Peroxidation

Navin Rauniyar and Laszlo Prokai\*

*Department of Molecular Biology & Immunology, University of North Texas Health Science Center, 3500 Camp Bowie Boulevard, Fort Worth, Texas 76107*

## Supplementary Figures:

**Figure S1.** Linearity of relative quantitation of the peptide FVNQHLC<sup>#</sup>GSHLVE (where # represents cysteine residue oxidized to cysteine-sulfonic acid, Cys-SO<sub>3</sub>H), Glu–C fragment of the oxidized insulin  $\beta$ -chain, by dimethyl tagging strategy using isotopic variants of formaldehyde. Two identical solutions of the peptide were dimethylated using light (H<sup>12</sup>CHO) or heavy (D<sup>13</sup>CDO) isotopes of formaldehyde, respectively. As summarized in chart **a**, the differentially tagged peptides were combined in various molar ratios (1:1, 1:5, 5:1, 1:10 and 10:1), desalted and analyzed by LC–MS for relative quantification of the isotopic pairs from XICs of the doublet ions at  $m/z$  779.87 (2+) and 782.89 (2+), respectively, which corresponded to the light and heavy dimethyl-labeled FVNQHLC<sup>#</sup>GSHLVE. The peptide was tagged only at its N-terminus as it contains a single amine group and, hence,  $\Delta$  was 6 Da (3 Th for the doubly-charged ions). Averaged over the elution of the differentially labeled peptides, chart **b** displays the  $[M+2H]^{2+}$  molecular-ion region of the recorded high resolution ESI mass spectra (full scan: from  $m/z$  350 to  $m/z$  1500).

**Figure S2.** CID-MS/MS spectra of the doubly charged (a) unlabeled ( $m/z$  904.02), (b) light ( $m/z$  918.03), and (c) heavy ( $m/z$  921.04) dimethyl-labeled HNE-modified peptide fragment of ATP synthase subunit beta peptide, LVLEVAQH\*LGESTVR (21-34).

---

\* Corresponding author. Phone: 817-735-2206. Fax: 817-735-2118. E-mail: lprokai@hsc.unt.edu.

**Figure S3.** LC–ESI-MS analysis of plasma protein tryptic digest spiked with differentially dimethyl-labeled HNE-modified angiotensin I, DRVYIHPFHL, in a ratio of 3:1 (without prior enrichment of HNE-modified peptides) (a) Base-peak chromatogram and (b) averaged full-scan mass spectrum from acquisitions in the 0 to 90-min retention time window. The inset shows mass spectrum of ions mostly corresponding to peptides from plasma protein and the relative abundance of angiotensin I, that is ~2% in the mixture.

**Figure S4.** LC–ESI-MS analysis of the ‘eluate’ fraction obtained after acid-catalyzed hydrolysis of the captured hydrazones during enrichment of spiked dimethylated HNE-modified angiotensin I from plasma protein tryptic digest using hydrazide-coated glass beads for chemoprecipitation. (a) Base-peak chromatogram and (b) averaged full-scan mass spectrum of the ‘eluate’ fraction from acquisitions in the 0 to 90-min retention time window. Expanded view of full-scan mass spectrum of isotopomeric pair corresponding to  $(M+3H)^{3+}$  ions of differentially dimethylated HNE-modified DRVYIHPFH\*L (\* indicate HNE moiety attached to the corresponding histidine) present in a ratio of 3:1 is shown in the inset.

**Figure S5. (a)** XICs and full-scan MS spectra of differentially dimethyl-labeled, triply-charged precursor ions of HNE-modified angiotensin I,  $^{\textcircled{D}}$ DRVYPHIFH\*L (where,  $^{\textcircled{D}}$  = dimethylated residue and \* = HNE-modified residue), at  $m/z$  494.28 and 496.29 spiked in a ratio of 1:3, 1:1 or 3:1 into plasma protein tryptic digest and reisolated from the complex matrix by hydrazide-based chemoprecipitation strategy. The observed ratios (i) 1:3, (ii) 1:1 and (iii) 3:1 of the  $[M+3H]^{3+}$  isotopic peptide pairs after enrichment were in close agreement to the expected ratios.

**(b)** XICs and full-scan MS spectra of differentially dimethyl-labeled, triply-charged precursor ions of doubly HNE-modified angiotensin I,  $^{\textcircled{D}}$ DRVYPH\*IFH\*L (where,  $^{\textcircled{D}}$  = dimethyl label and \* = HNE-modified residues), at  $m/z$  546.32 and 548.33 obtained after enrichment and depicting the observed light/heavy ratios (i) 1:3, (ii) 1:1 and (iii) 3:1 of the isotopic peptide pairs were in close agreement to the spiked ratios.

**Figure S6.** XICs and full-scan MS spectra of differentially dimethyl-labeled, doubly-charged precursor ions of HNE-modified vimentin tryptic peptide,  $^{\textcircled{D}}$ QVQSLTC\*EVDALK $^{\textcircled{D}}$  (where,  $^{\textcircled{D}}$  = dimethylated residue and \* = HNE-modified residue) at  $m/z$  823.46 and 829.49, mixed in a ratio of 1:3, 1:1 or 3:1 and subsequently isolated by hydrazide-based chemoprecipitation strategy for

LC–MS analyses. The observed ratios (i) 1:3, (ii) 1:1 and (iii) 3:1 of the  $[M+2H]^{2+}$  isotopic peptide pairs after enrichment were in close agreement to the expected ratios.

**Figure S7.** XICs of mono-dimethyl labeled, doubly charged precursor ions of HNE-modified ATP synthase subunit beta peptide fragment,  $^{\textcircled{a}}\text{LVLEVAQH}^*\text{LGESTVR}$  (where,  $^{\textcircled{a}}$  = dimethylated and  $*$  = HNE-modified residue).

**Figure S8.** XICs and CID-MS/MS spectra of dimethyl-tagged, doubly-charged precursor ions of Glu–C fragment of HNE-modified oxidized insulin beta chain,  $^{\textcircled{a}}\text{FVNQH}^*\text{LC}^{\#}\text{GSHLVE}$  (where,  $^{\textcircled{a}}$  = dimethylated,  $*$  = HNE-modified residue and  $\#$  = cysteine-sulfonic acid, Cys-SO<sub>3</sub>H).

**Figure S9.** XICs and CID-MS/MS spectra of dimethyl-tagged, triply-charged precursor ions of HNE-modified peptide [ $^{\textcircled{a}}\text{LGFLGSNTPHVNHMMPPH}$ ] $*$  (where,  $^{\textcircled{a}}$  = dimethylated). The neutral loss of HNE from the fragment ions during collision induced dissociation tandem mass spectrometry precluded the localization of the site of HNE modification (\*).

**Figure S10.** XICs and CID-MS/MS spectra of bis-dimethyl-tagged, doubly-charged precursor ions of HNE-modified apomyoglobin tryptic fragment,  $^{\textcircled{a}}\text{H}^*\text{PGDFGADAQGAMTK}^{\textcircled{a}}$  (where,  $^{\textcircled{a}}$  = dimethylated and  $*$  = HNE-modified residue).

**Figure S11.** XICs and CID-MS/MS spectra of bis-dimethyl-tagged, doubly-charged precursor ions of HNE-modified apomyoglobin tryptic fragment,  $^{\textcircled{a}}\text{LFTGH}^*\text{PETLEK}^{\textcircled{a}}$  (where,  $^{\textcircled{a}}$  = dimethylated and  $*$  = HNE-modified residue).

Figure S1a

| $\frac{(\text{CH}_3)_2\text{-FVNQHLC\#GSHLVE}}{(^{13}\text{CD}_2\text{H})_2\text{-FVNQHLC\#GSHLVE}} = \frac{\text{Light}}{\text{Heavy}}$ | <table><tr><th>Expt ratios</th><th>Obs ratios</th></tr><tr><td>0.1</td><td>0.08</td></tr><tr><td>0.2</td><td>0.18</td></tr><tr><td>1</td><td>1.005</td></tr><tr><td>5</td><td>5.36</td></tr><tr><td>10</td><td>11.16</td></tr></table> | Expt ratios | Obs ratios | 0.1 | 0.08 | 0.2 | 0.18 | 1 | 1.005 | 5 | 5.36 | 10 | 11.16 |
|------------------------------------------------------------------------------------------------------------------------------------------|----------------------------------------------------------------------------------------------------------------------------------------------------------------------------------------------------------------------------------------|-------------|------------|-----|------|-----|------|---|-------|---|------|----|-------|
| Expt ratios                                                                                                                              | Obs ratios                                                                                                                                                                                                                             |             |            |     |      |     |      |   |       |   |      |    |       |
| 0.1                                                                                                                                      | 0.08                                                                                                                                                                                                                                   |             |            |     |      |     |      |   |       |   |      |    |       |
| 0.2                                                                                                                                      | 0.18                                                                                                                                                                                                                                   |             |            |     |      |     |      |   |       |   |      |    |       |
| 1                                                                                                                                        | 1.005                                                                                                                                                                                                                                  |             |            |     |      |     |      |   |       |   |      |    |       |
| 5                                                                                                                                        | 5.36                                                                                                                                                                                                                                   |             |            |     |      |     |      |   |       |   |      |    |       |
| 10                                                                                                                                       | 11.16                                                                                                                                                                                                                                  |             |            |     |      |     |      |   |       |   |      |    |       |

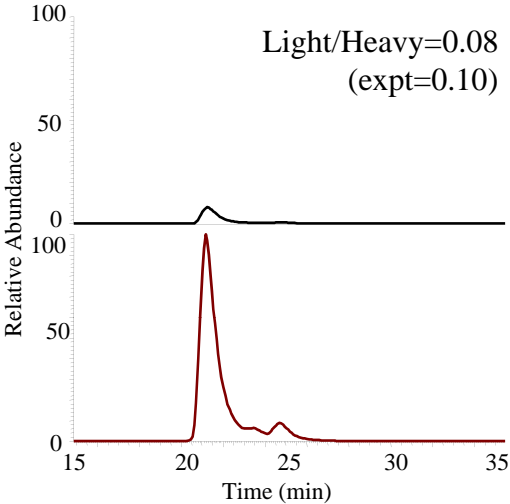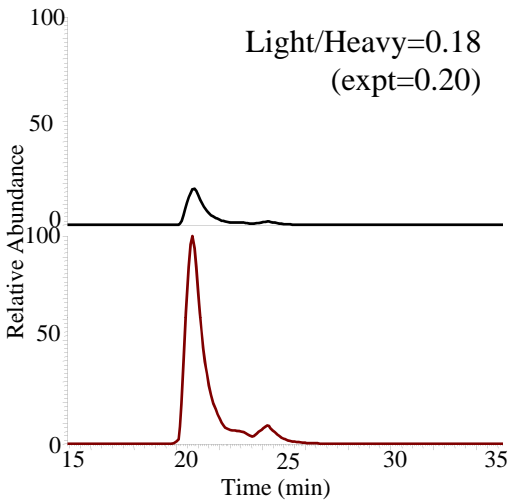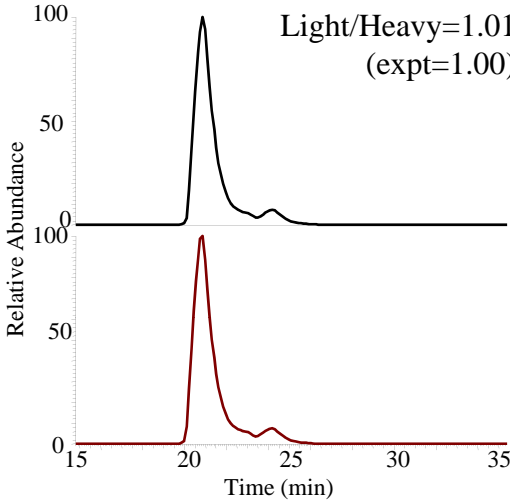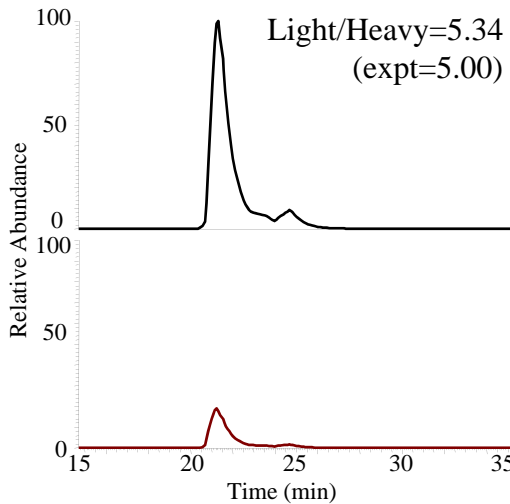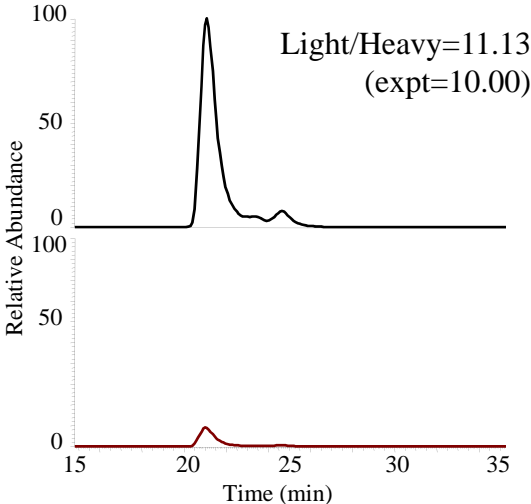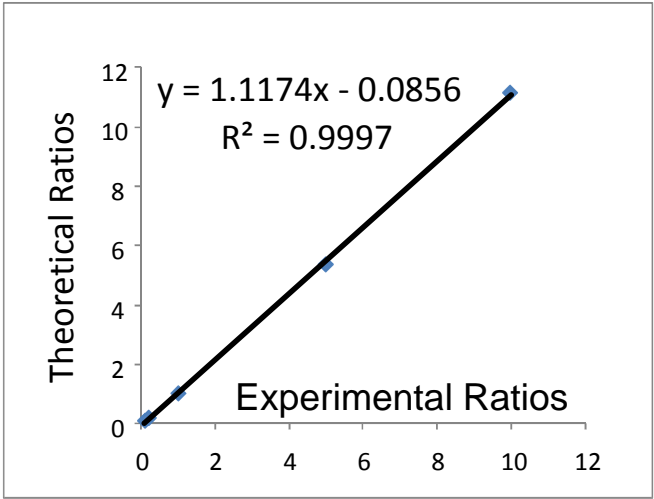

**Figure S1b**

$(\text{CH}_3)_2\text{-FVNQHLC\#GSHLVE}$

$(^{13}\text{CD}_2\text{H})_2\text{-FVNQHLC\#GSHLVE}$

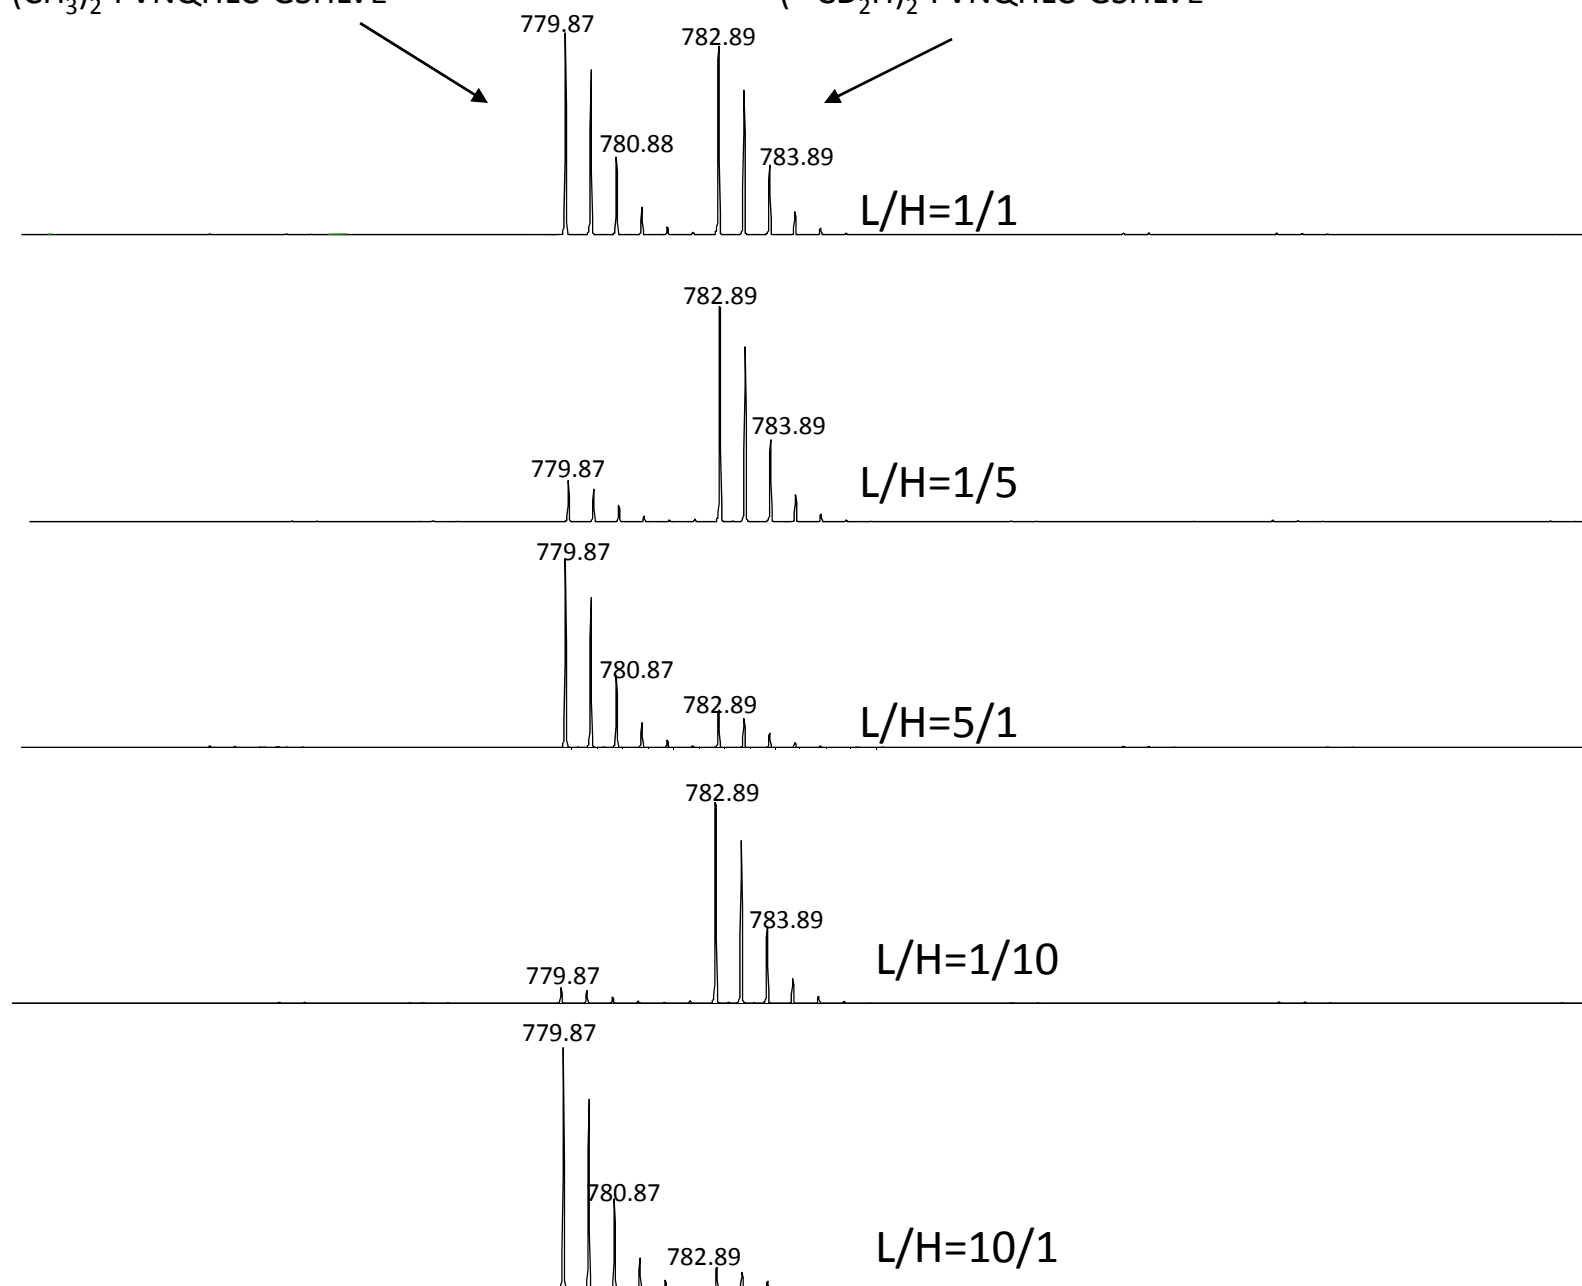

**Figure S2**

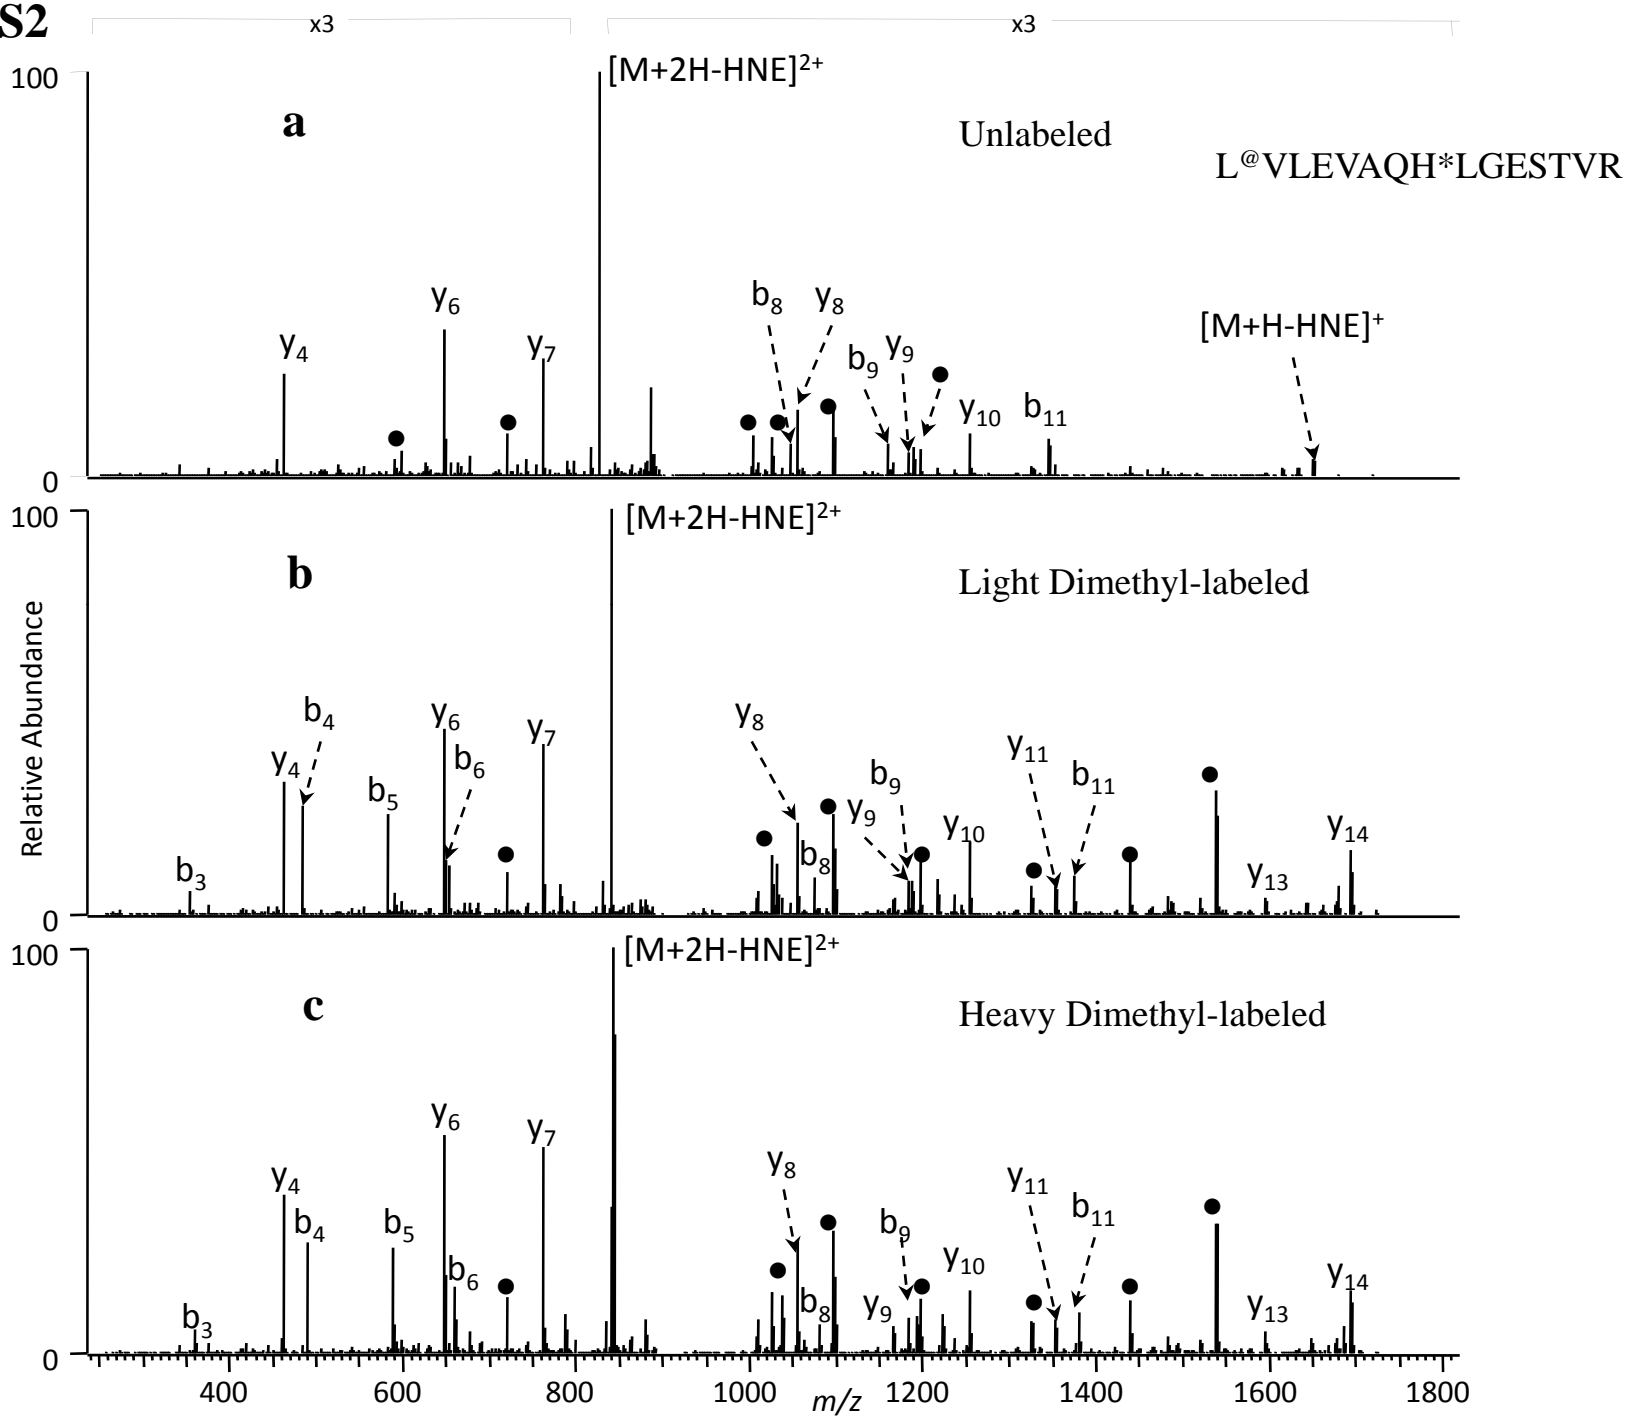

**Figure S3**

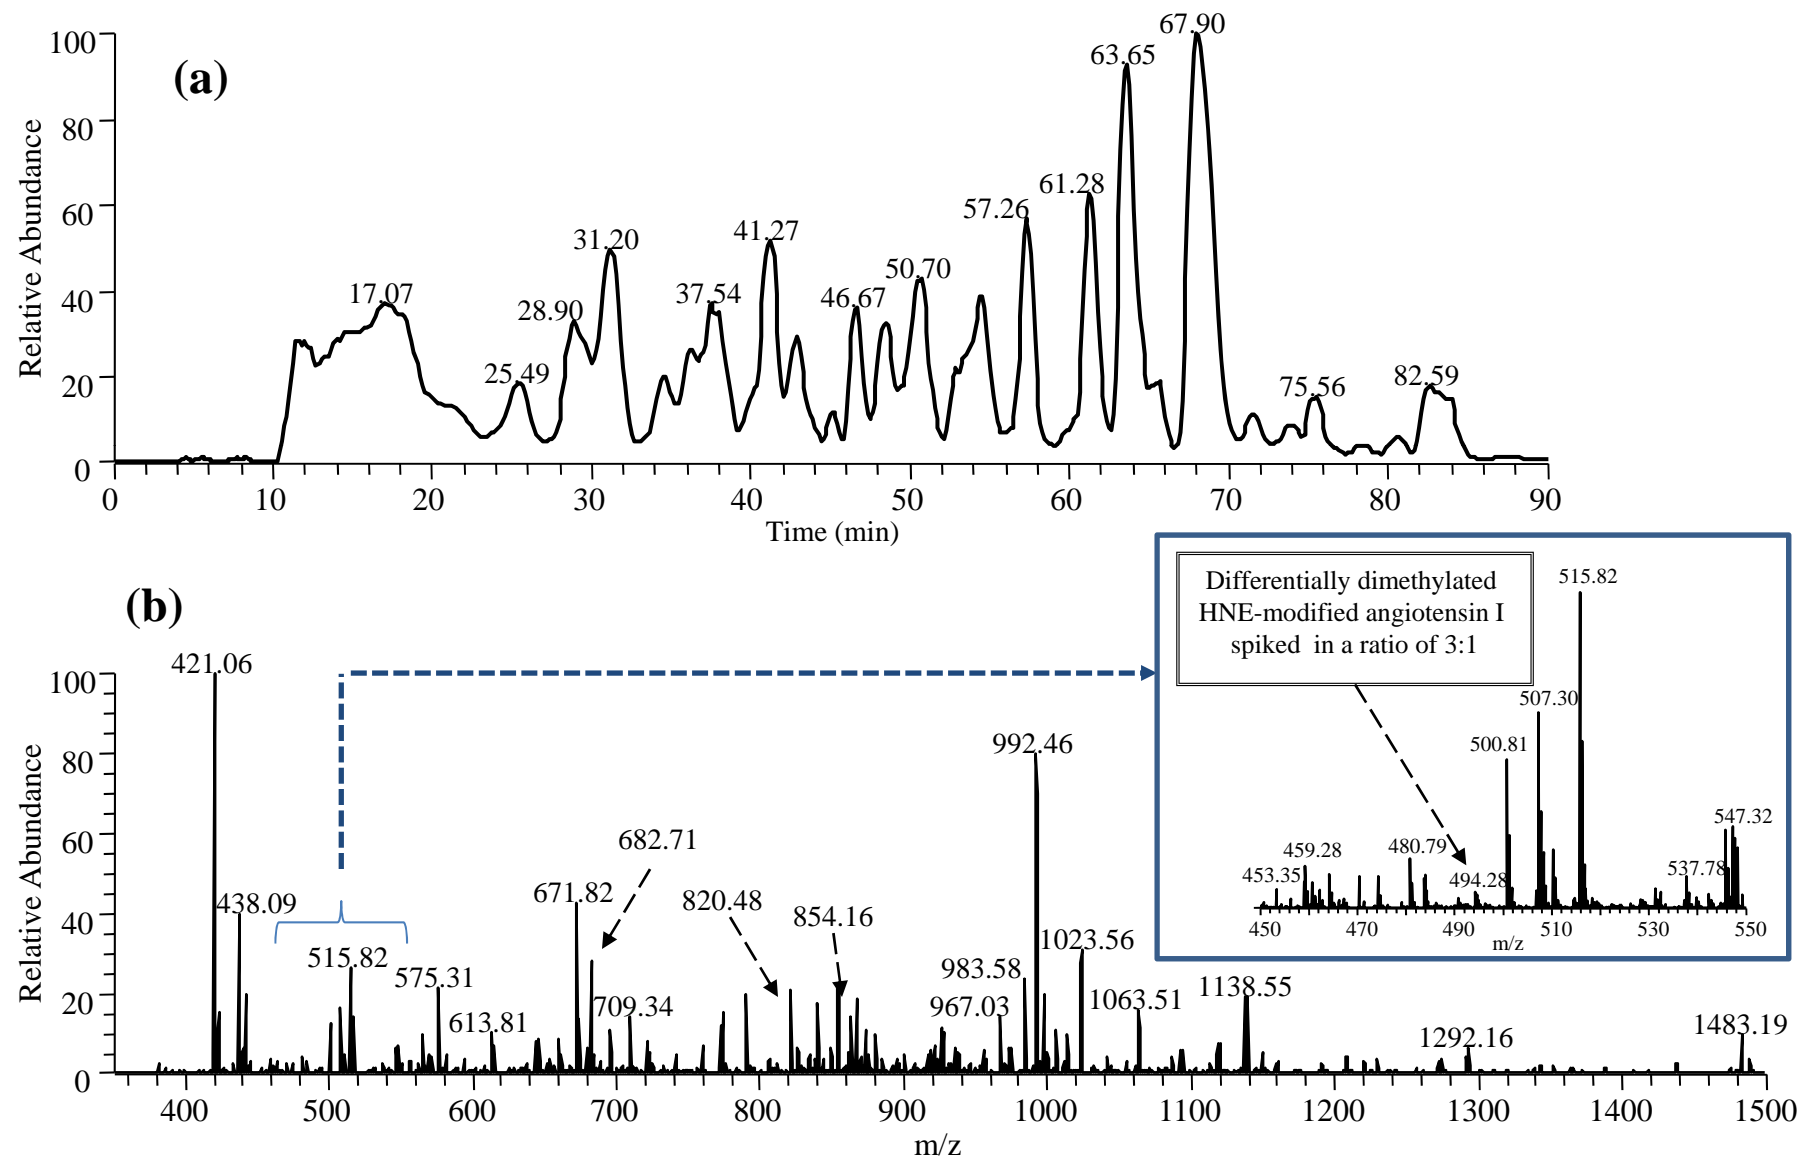

**Figure S4**  $(\text{C}^{12}\text{H}_3)_2\text{--DRVYIHPFH}^*\text{L}$   
&  
 $(\text{C}^{13}\text{HD}_2)_2\text{--DRVYIHPFH}^*\text{L}$

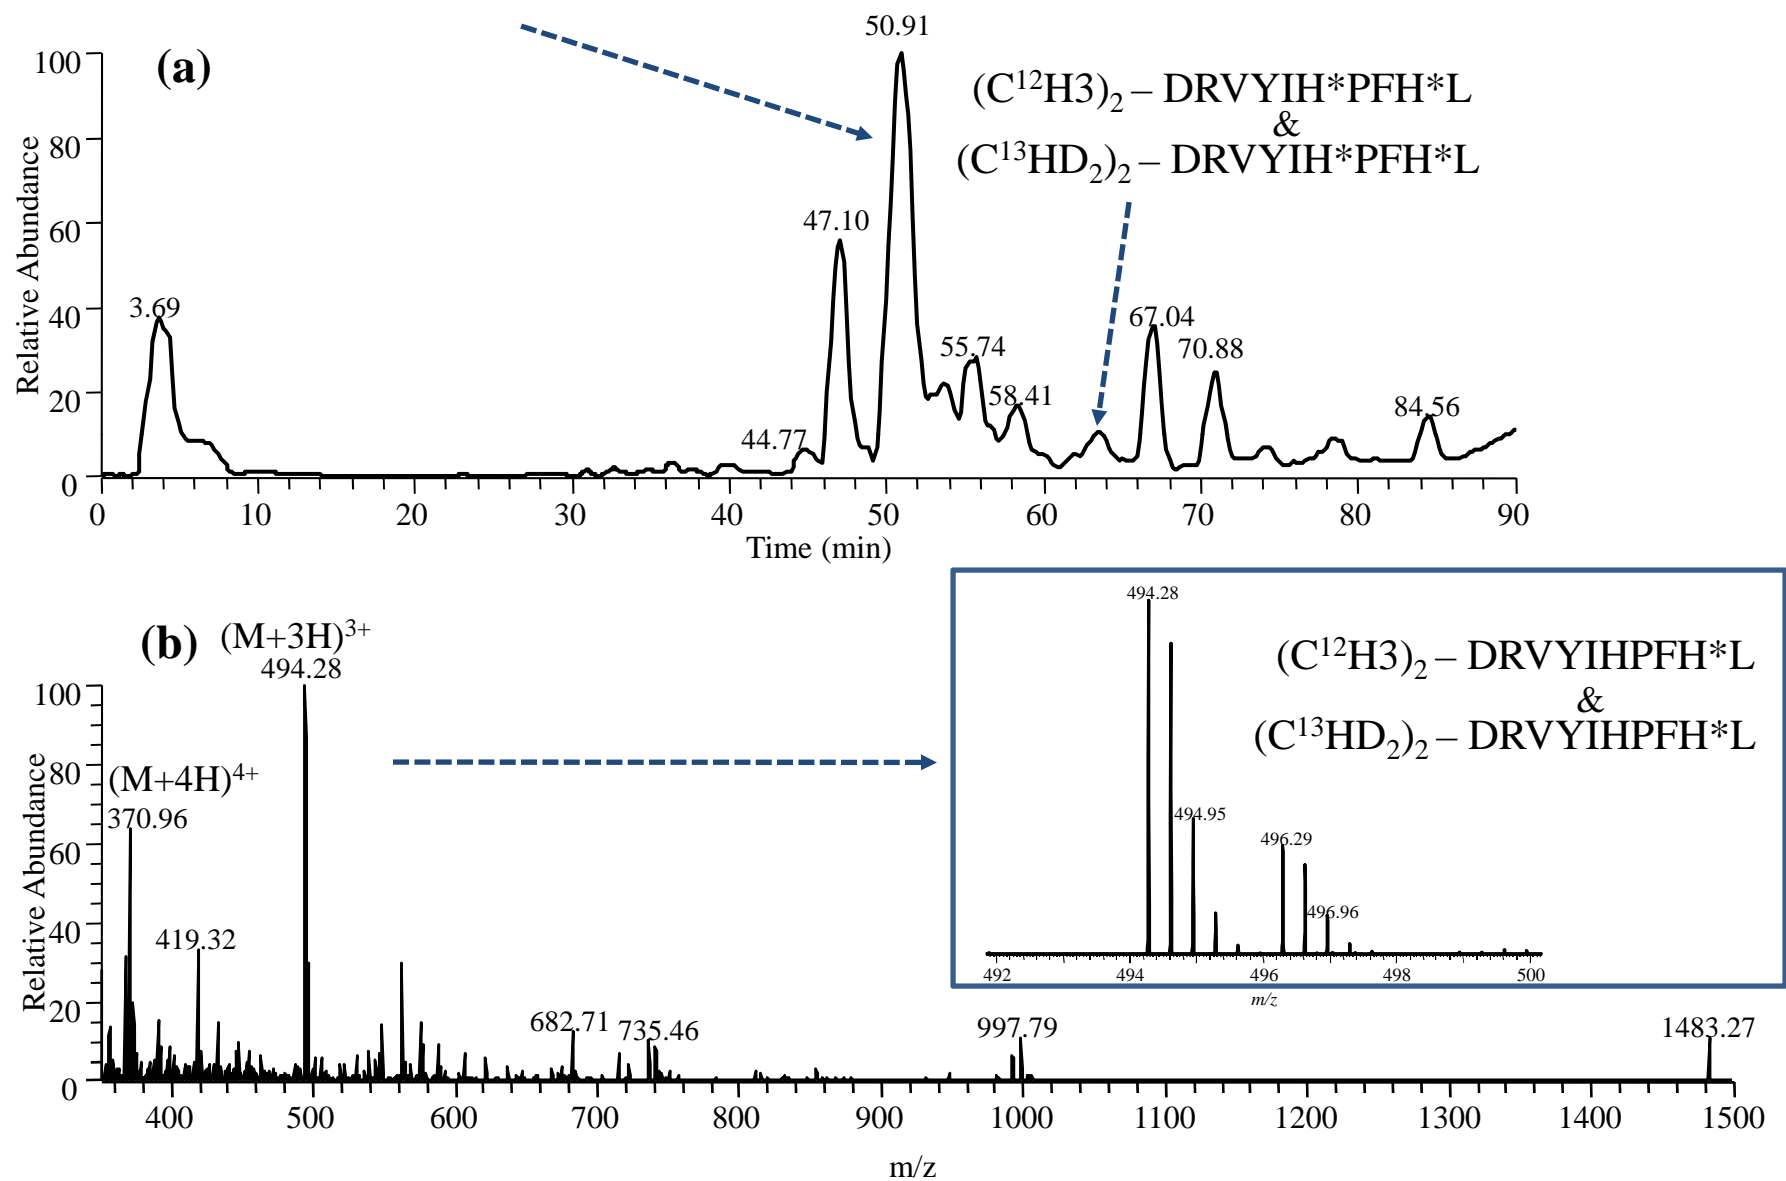

**Figure S5 (a)**      **i)** Light/Heavy=0.33  
(expt=0.33)

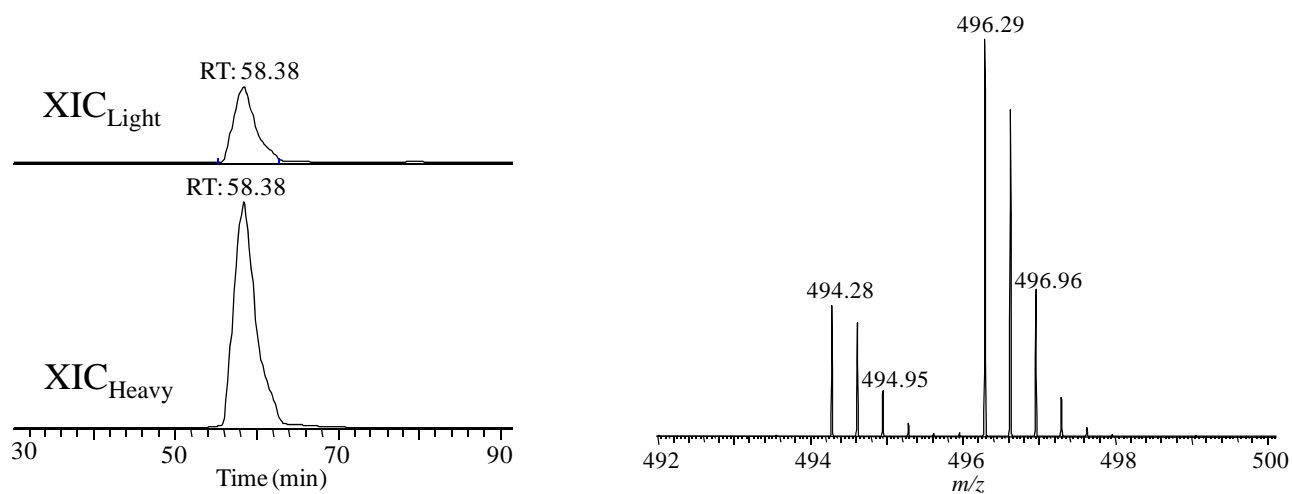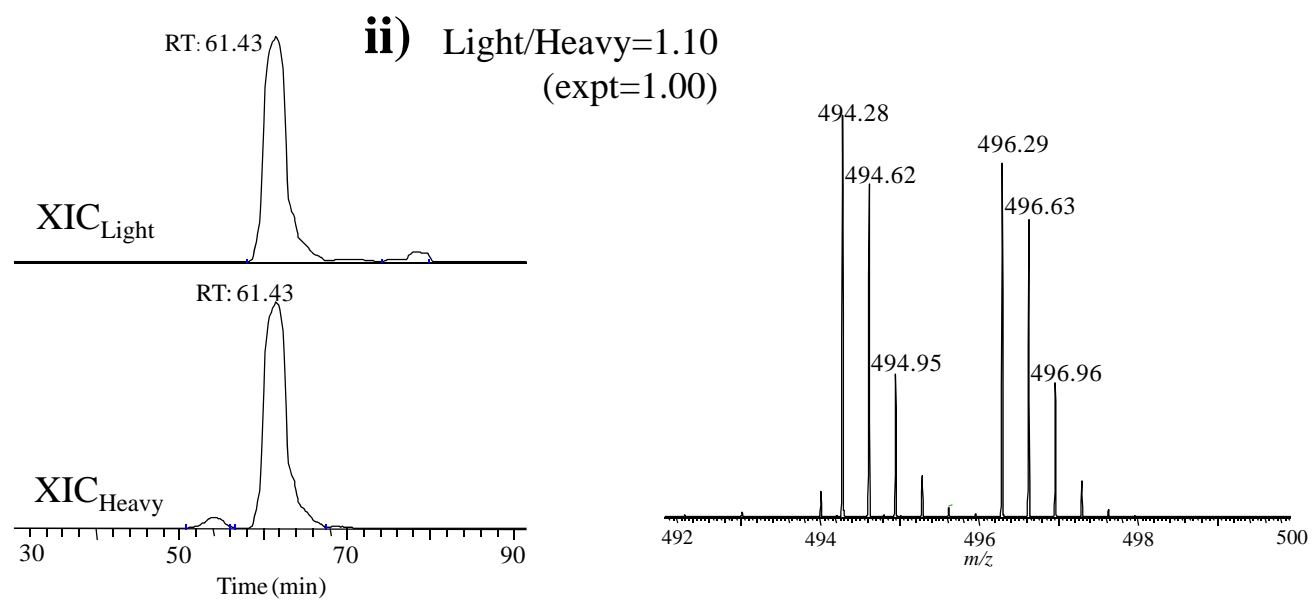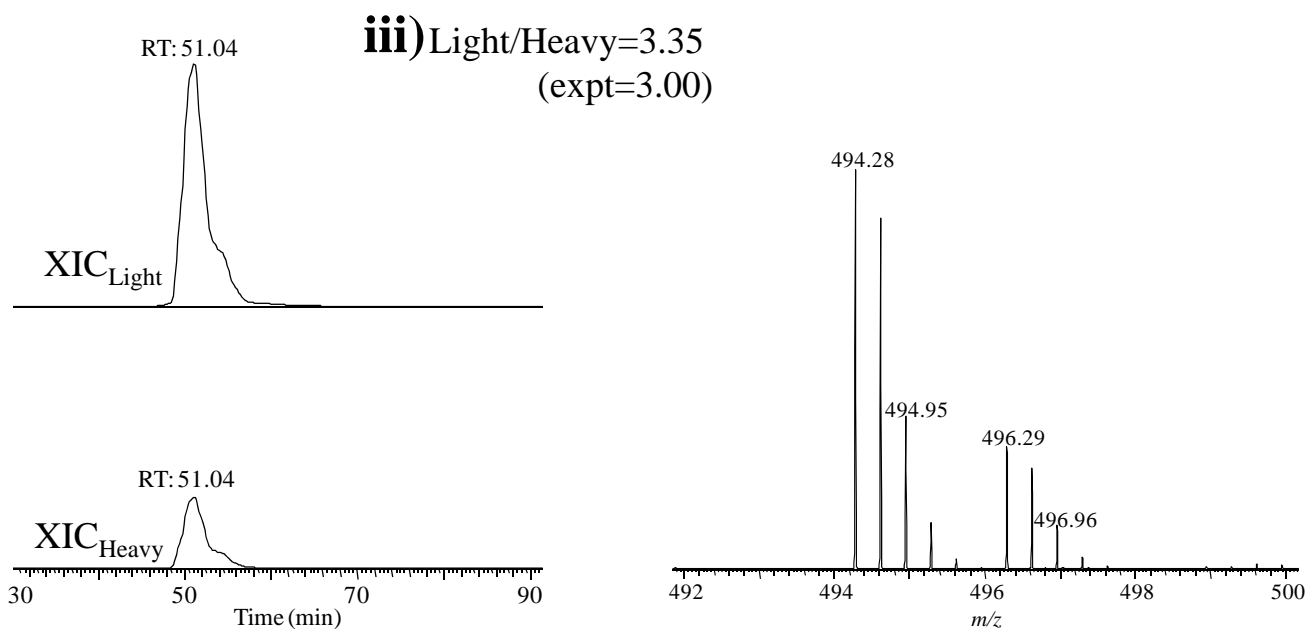

**Figure S5 (b)**

**i)** Light/Heavy=0.36  
(expt=0.33)

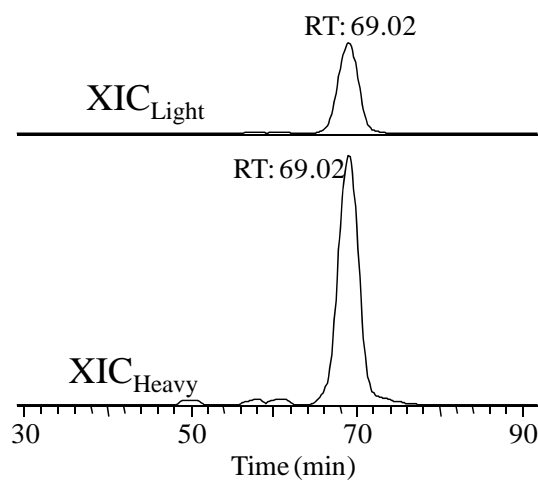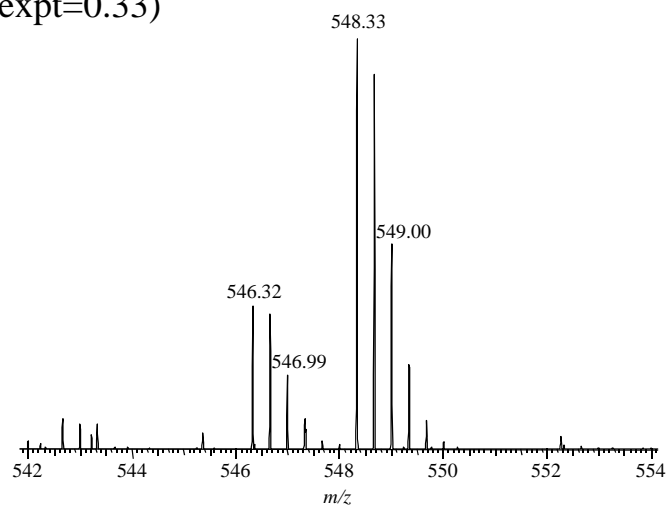

**ii)** Light/Heavy=1.19  
(expt=1.00)

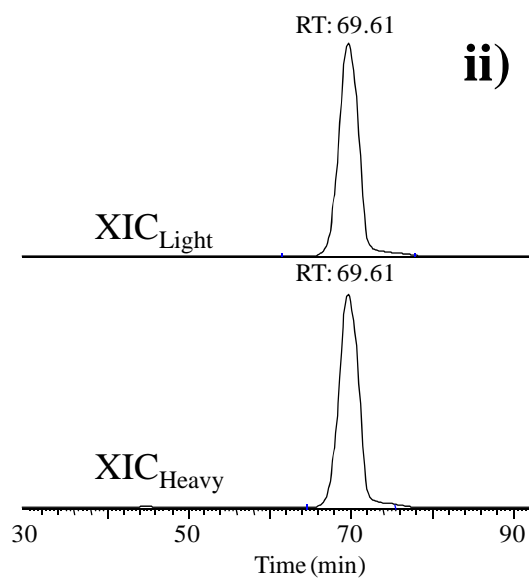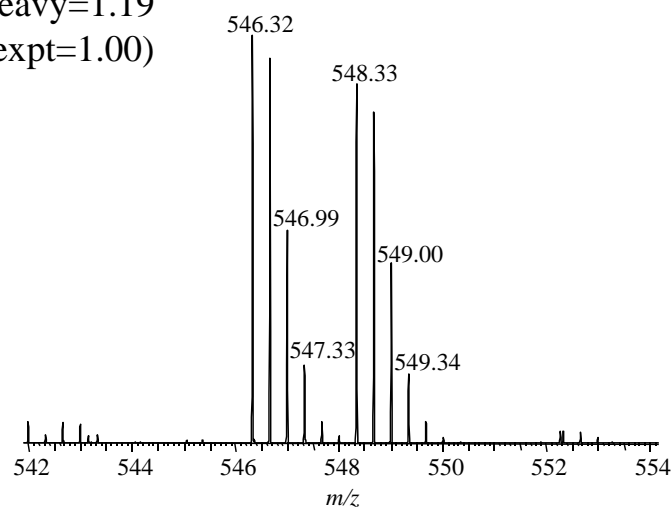

**iii)** Light/Heavy=3.40  
(expt=3.00)

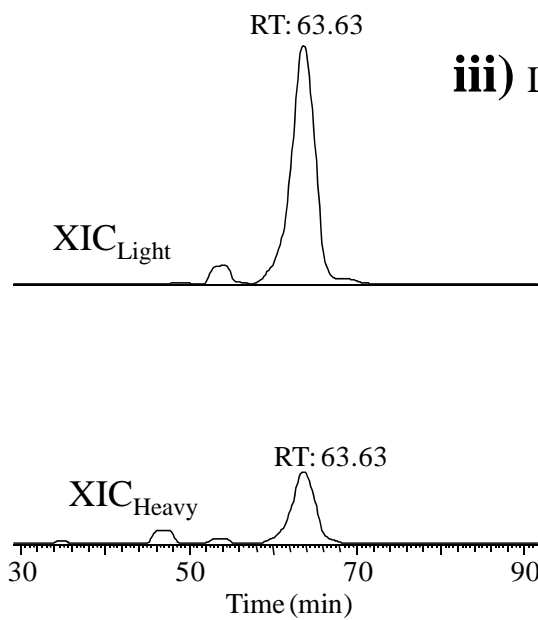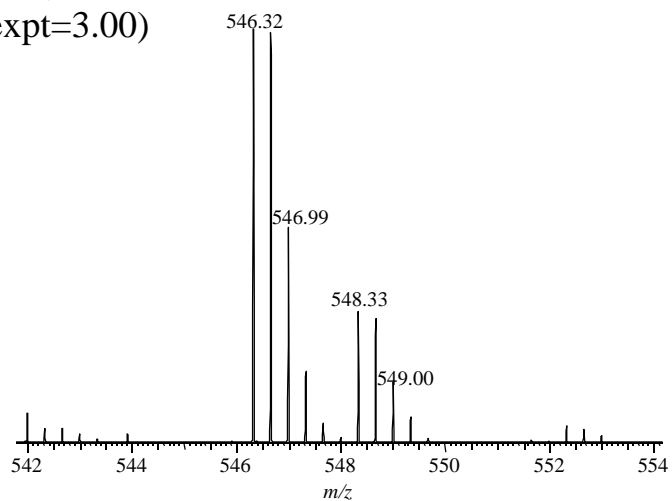

i) Light/Heavy=0.31  
(expt=0.33)

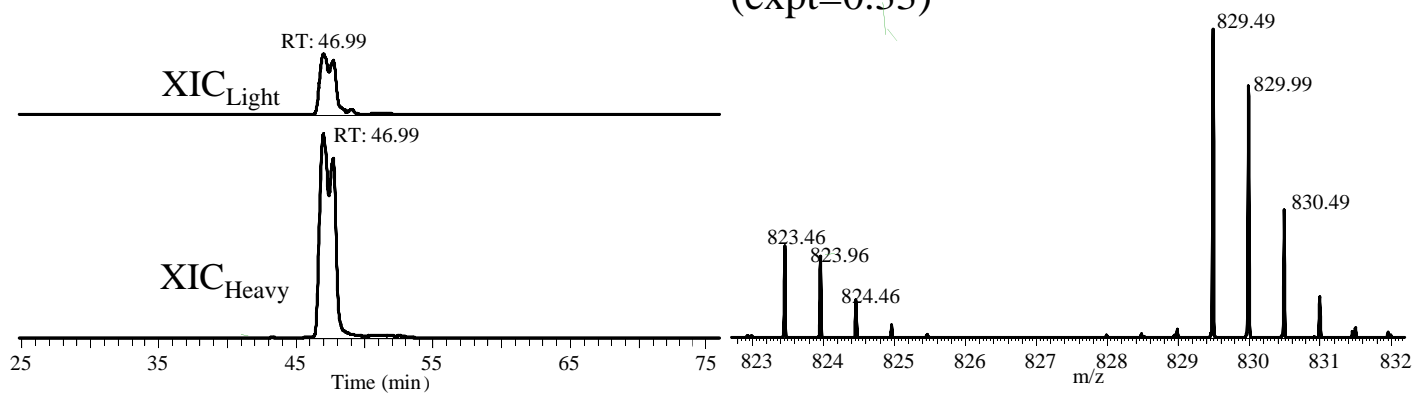

ii) Light/Heavy=1.00  
(expt=1.00)

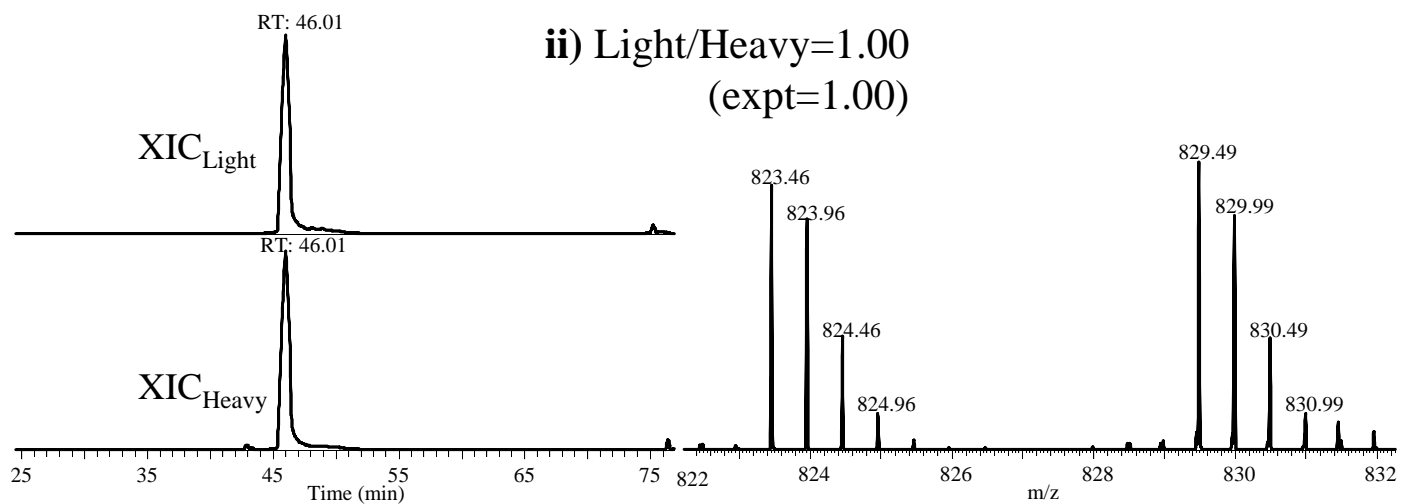

iii) Light/Heavy=2.86  
(expt=3.00)

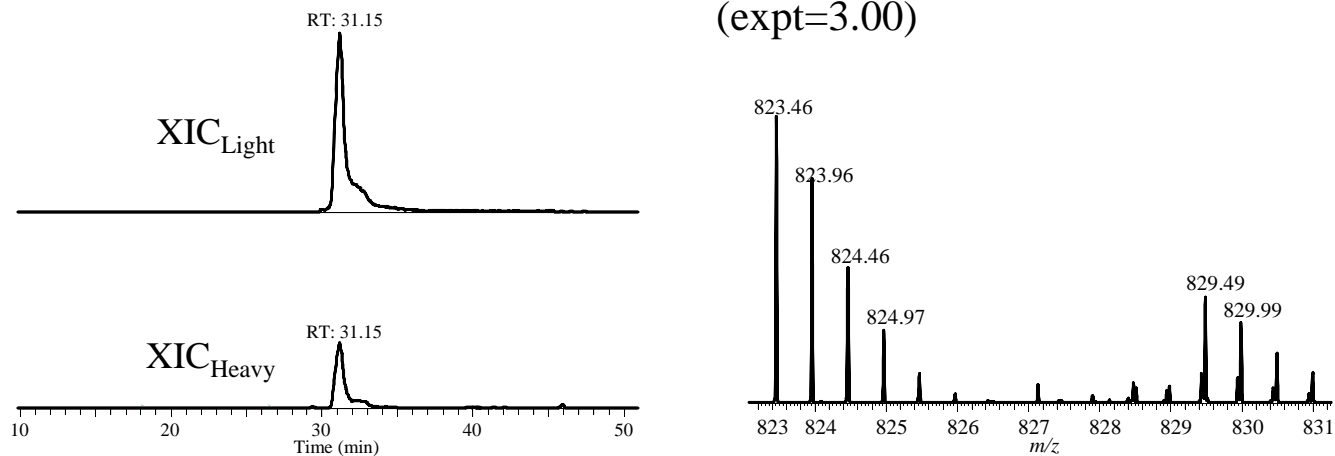

## Supplementary Figure S7

$[M+2H]^{2+}$ ,  $m/z$  918.03, **921.05**

@LVLEVAQH\*LGESTVR

(HNE-modified ATP synthase  $\beta$ -subunit peptide:

MS/MS spectra shown in Fig. S2)

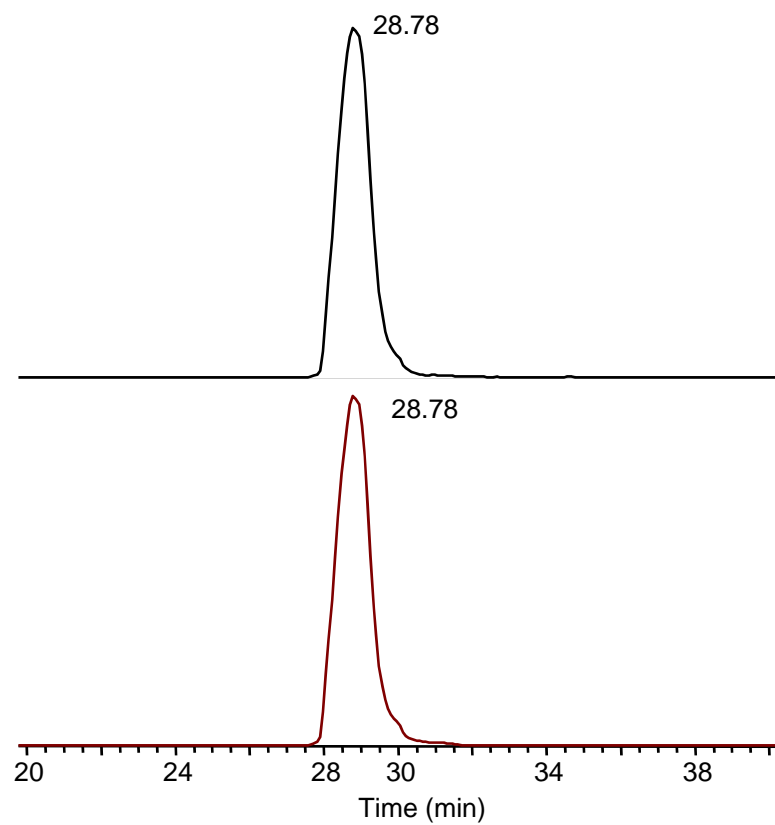

## Supplementary Figure S8

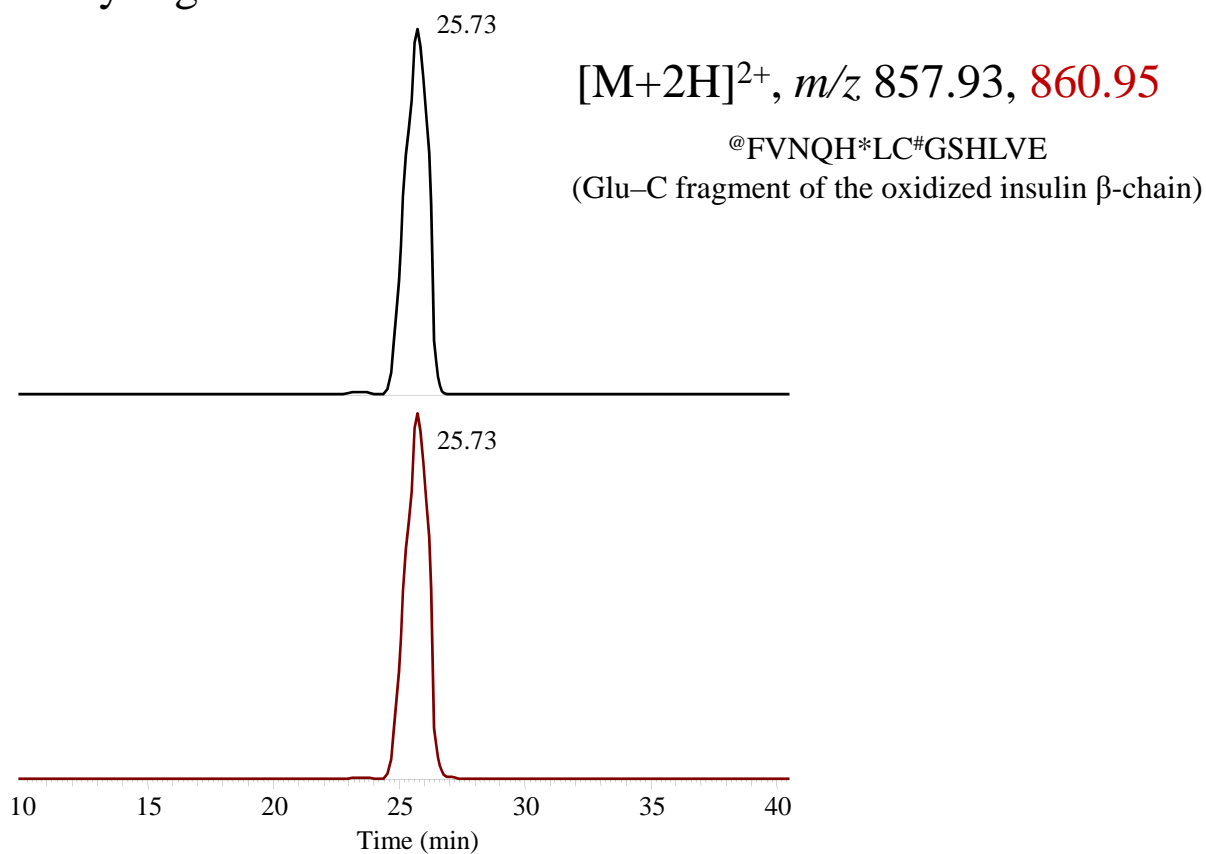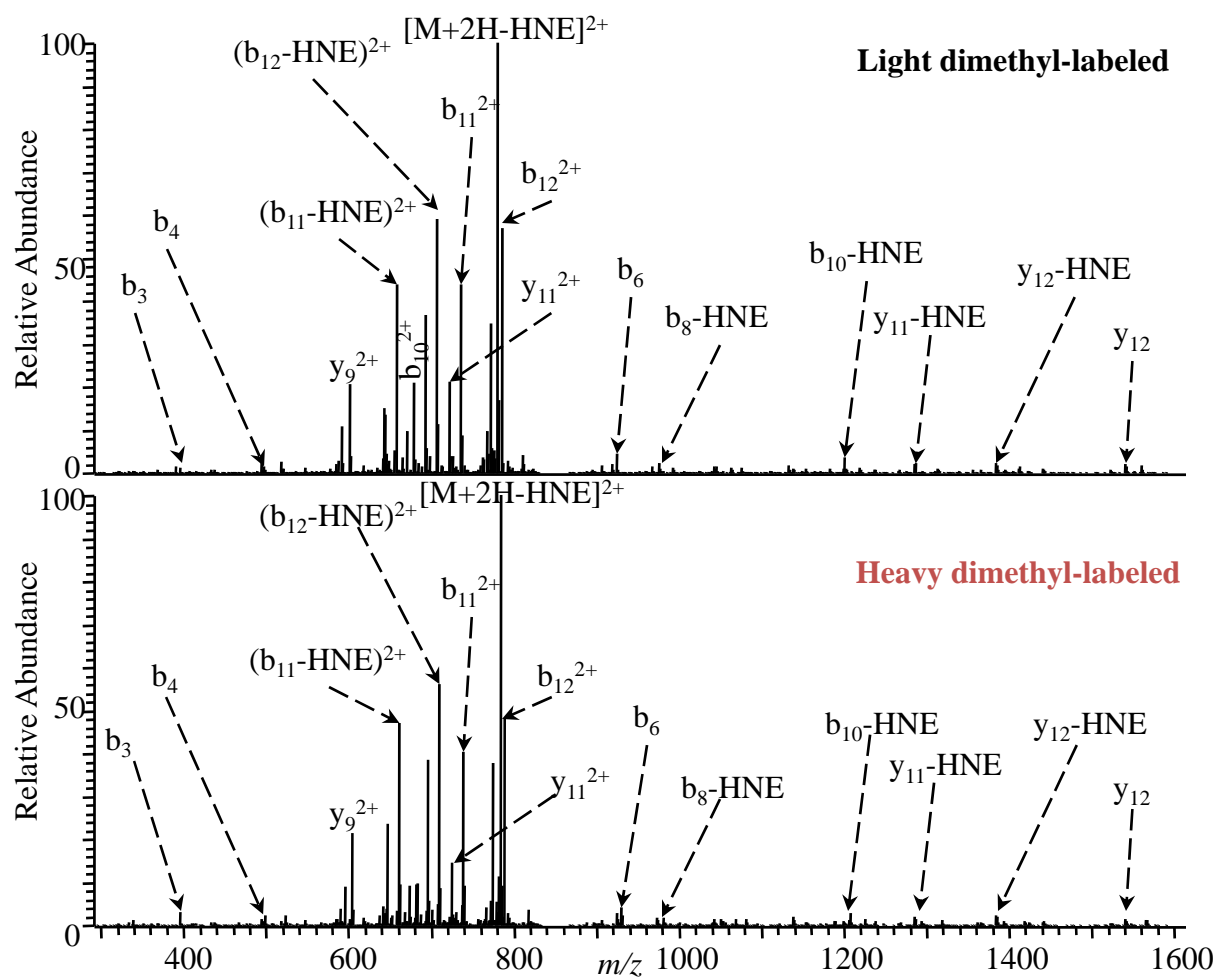

# Supplementary Figure S9

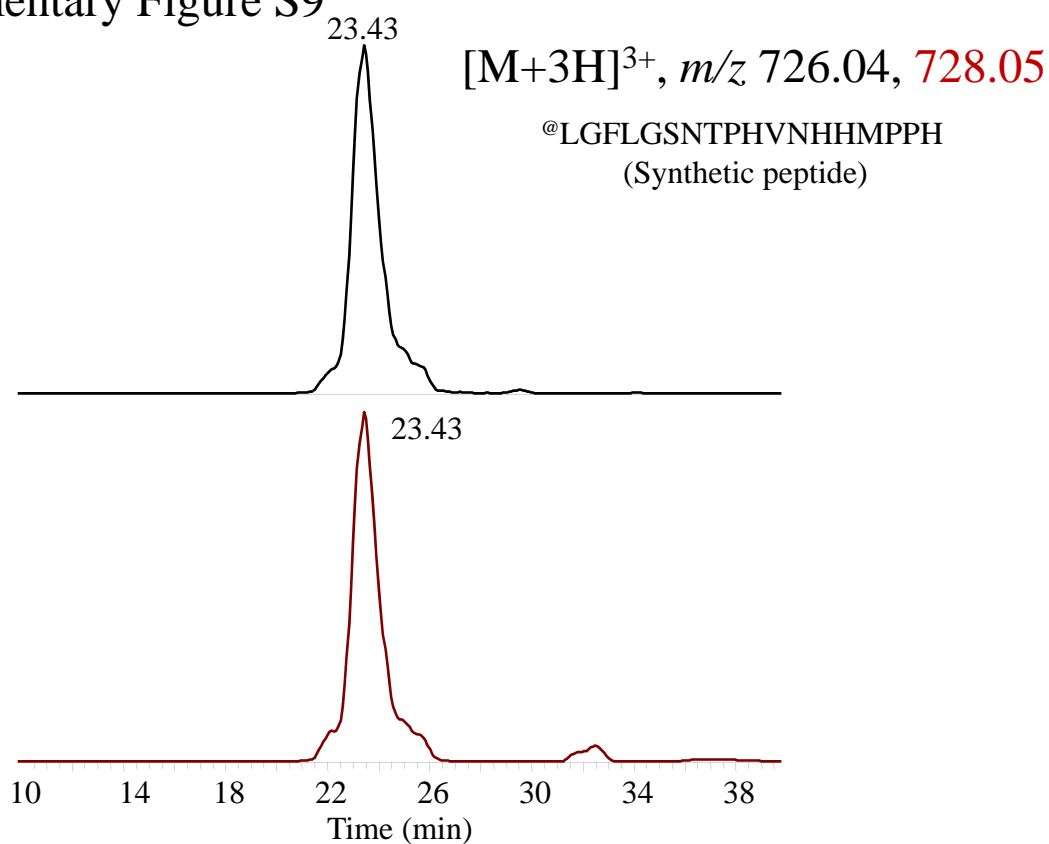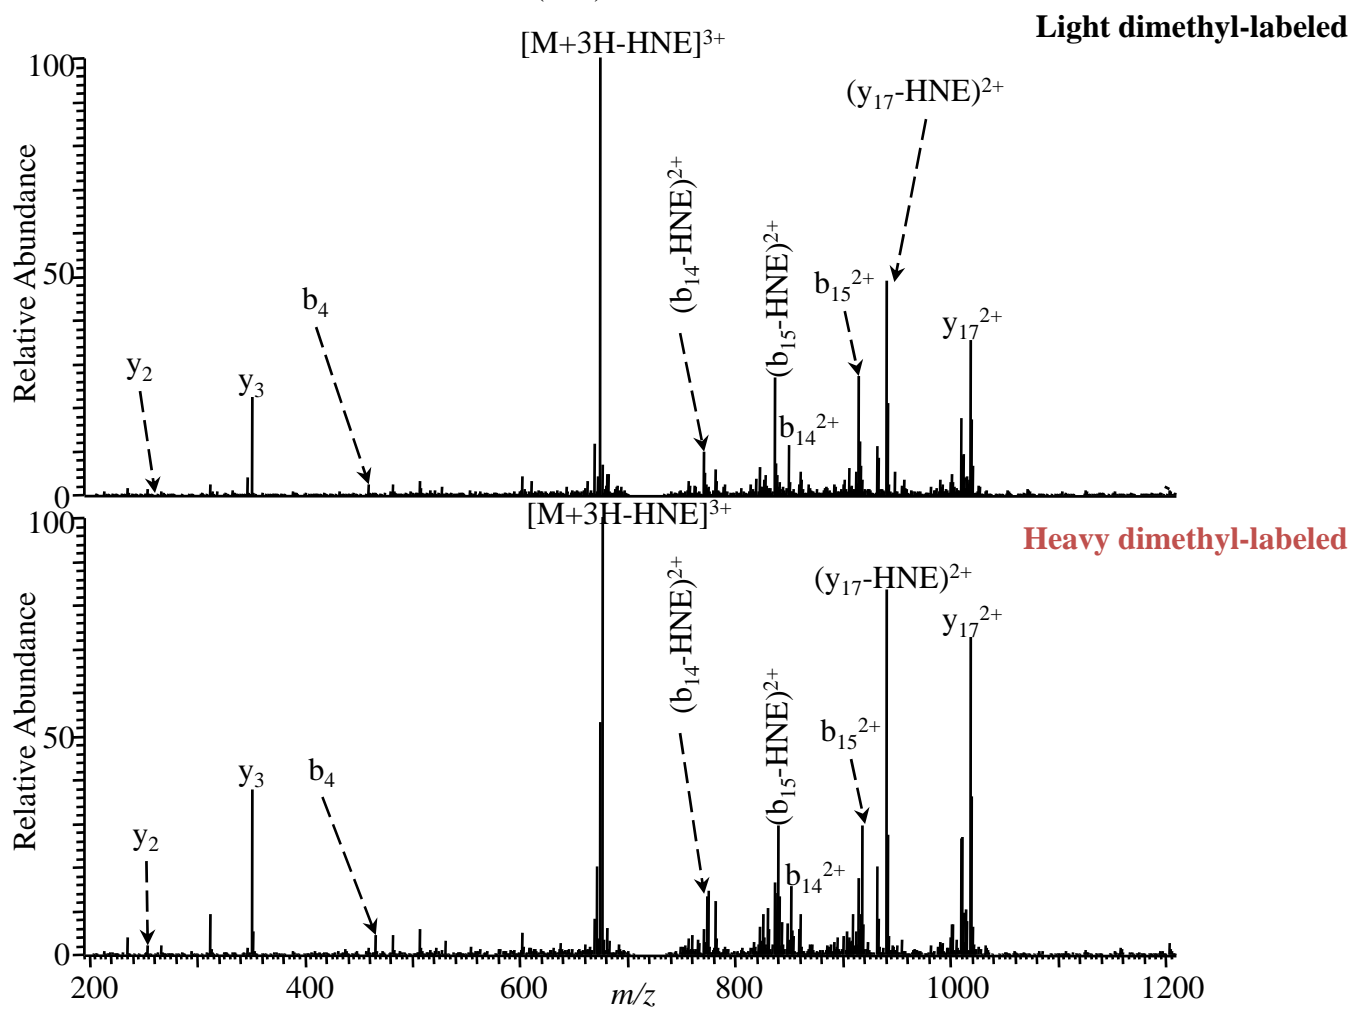

## Supplementary Figure S10

$[M+2H]^{2+}$ ,  $m/z$  857.93, **863.96**

@H\*PGDFGADAQGAMTK@  
(apomyoglobin tryptic peptide)

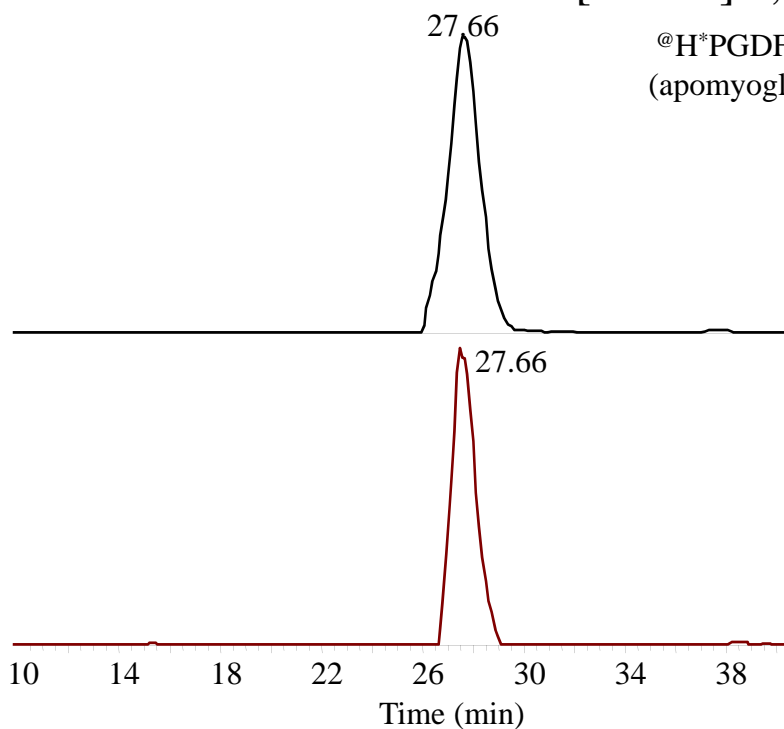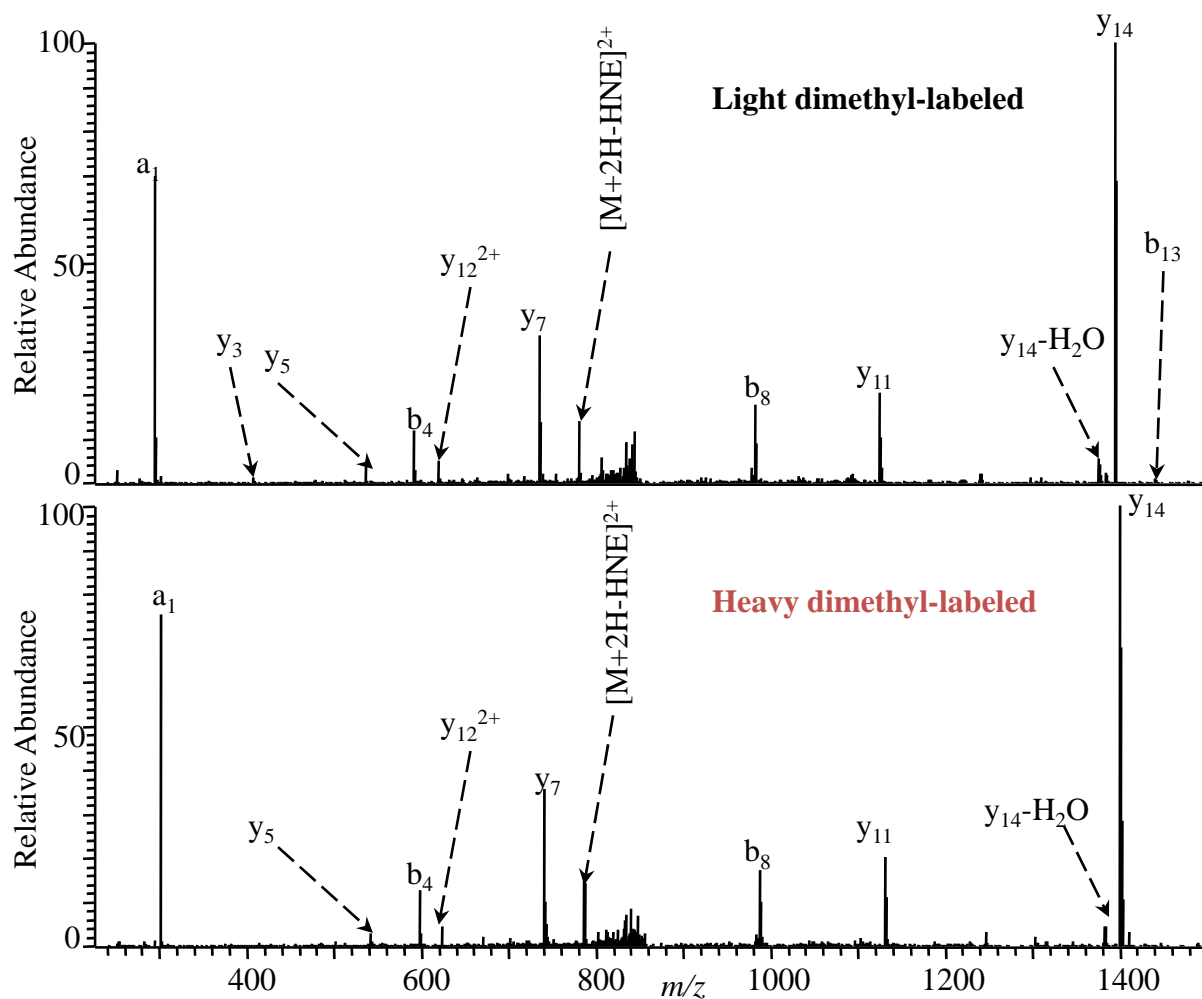

## Supplementary Figure S11

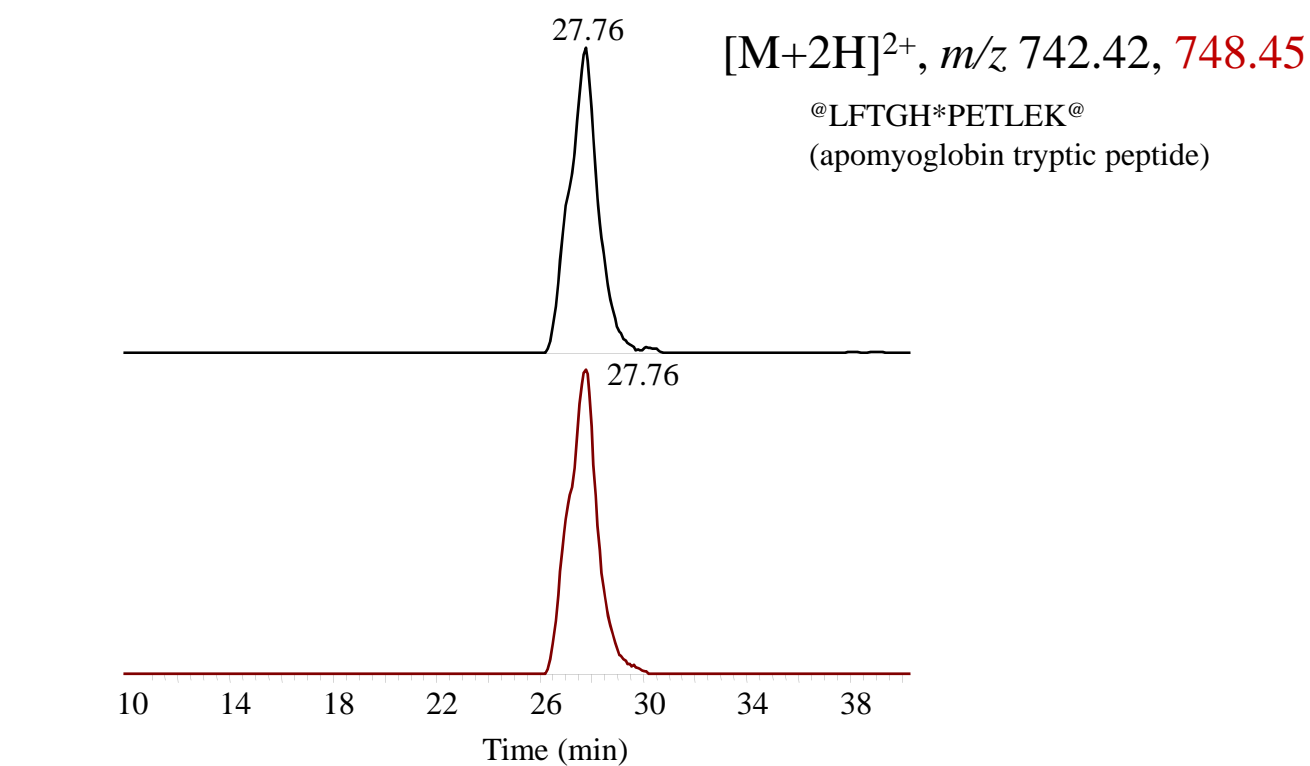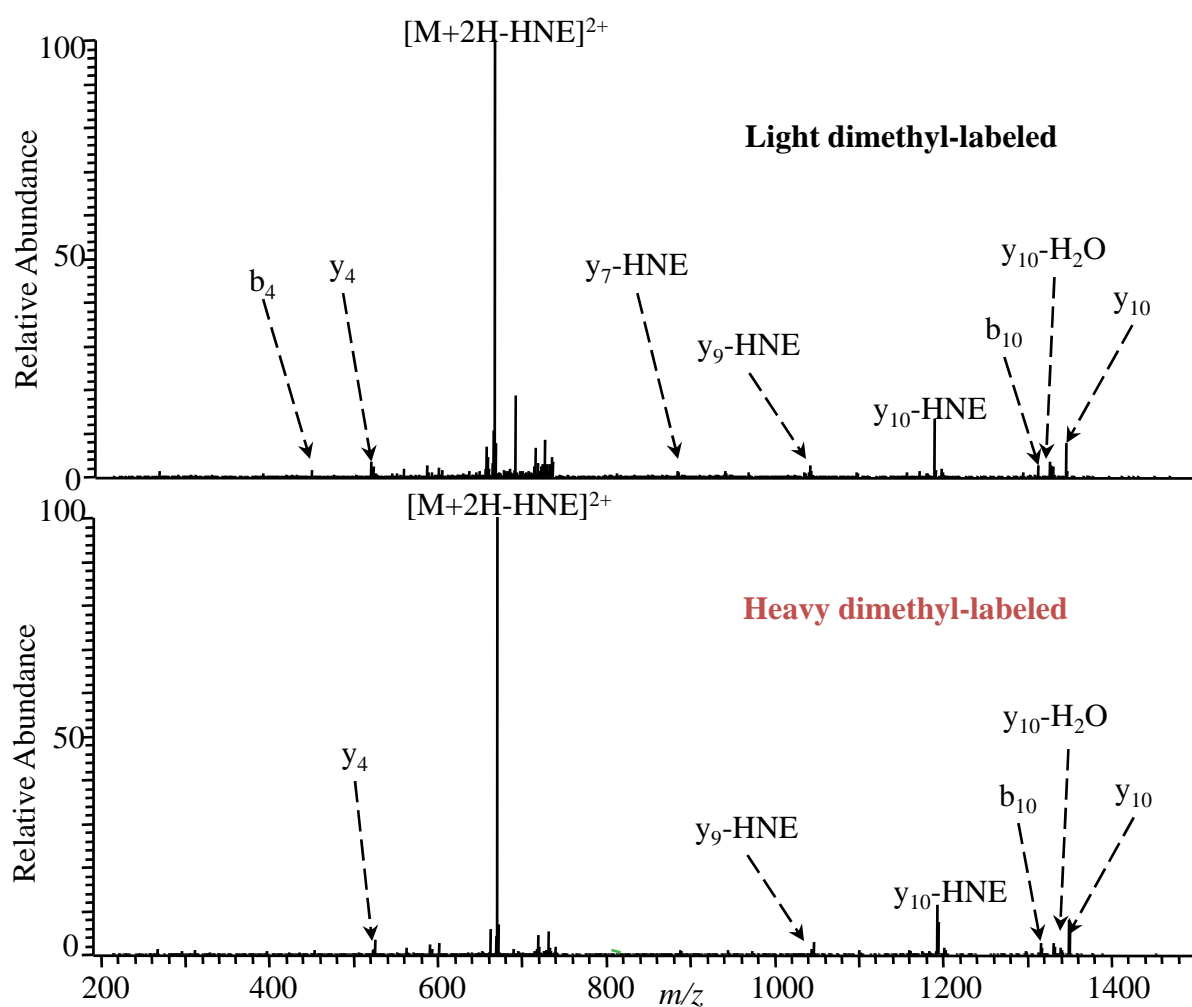

Supplement: NIHMS326732-supplement-Supp_Fig_S1-S11.pdf [file NIHMS326732-supplement-Supp_Fig_S1-S11.pdf]
